# Supplementary material for: Spatiotemporal high-resolution prediction and mapping: methodology and application to dengue disease
Source: PubMed Central journal article supplement (PMC8857957; doi:10.1007/s10109-021-00368-0), 2022-02-19
Supplement: 10109_2021_368_MOESM1_ESM.pdf [file 10109_2021_368_MOESM1_ESM.pdf]

## Online Resource 1

**Table A.1 Districts labels and population at risk**

| <i>id</i> | District         | Population at Risk by Year |           |           |           |           |           |           |
|-----------|------------------|----------------------------|-----------|-----------|-----------|-----------|-----------|-----------|
|           |                  | 2012                       | 2013      | 2014      | 2015      | 2016      | 2017      | 2018      |
| 1         | Gedebage         | 439,884                    | 444,984   | 451,884   | 451,884   | 451,884   | 451,884   | 451,884   |
| 2         | Ujungberung      | 912,252                    | 922,824   | 945,600   | 945,600   | 945,600   | 945,600   | 945,600   |
| 3         | Cinambo          | 299,304                    | 302,772   | 310,272   | 310,272   | 310,272   | 310,272   | 310,272   |
| 4         | Bandung Kulon    | 1,689,360                  | 1,708,932 | 1,780,536 | 1,780,536 | 1,780,536 | 1,780,536 | 1,780,536 |
| 5         | Andir            | 1,157,220                  | 1,170,636 | 1,215,744 | 1,215,744 | 1,215,744 | 1,215,744 | 1,215,744 |
| 6         | Babakan Ciparay  | 1,744,932                  | 1,765,152 | 1,839,120 | 1,839,120 | 1,839,120 | 1,839,120 | 1,839,120 |
| 7         | Bojongloa Kaler  | 1,428,300                  | 1,444,860 | 1,505,364 | 1,505,364 | 1,505,364 | 1,505,364 | 1,505,364 |
| 8         | Sukajadi         | 1,285,596                  | 1,300,500 | 1,350,516 | 1,350,516 | 1,350,516 | 1,350,516 | 1,350,516 |
| 9         | Cidadap          | 695,988                    | 704,064   | 728,448   | 728,448   | 728,448   | 728,448   | 728,448   |
| 10        | Coblong          | 1,560,276                  | 1,578,360 | 1,641,564 | 1,641,564 | 1,641,564 | 1,641,564 | 1,641,564 |
| 11        | Cicendo          | 1,183,308                  | 1,197,024 | 1,243,176 | 1,243,176 | 1,243,176 | 1,243,176 | 1,243,176 |
| 12        | Bandung Wetan    | 369,204                    | 373,488   | 385,956   | 385,956   | 385,956   | 385,956   | 385,956   |
| 13        | Sumurbandung     | 433,920                    | 438,948   | 449,808   | 449,808   | 449,808   | 449,808   | 449,808   |
| 14        | Batununggal      | 1,434,492                  | 1,451,124 | 1,506,852 | 1,506,852 | 1,506,852 | 1,506,852 | 1,506,852 |
| 15        | Cibeunying Kidul | 1,278,852                  | 1,293,672 | 1,345,440 | 1,345,440 | 1,345,440 | 1,345,440 | 1,345,440 |
| 16        | Regol            | 966,408                    | 977,604   | 1,018,608 | 1,018,608 | 1,018,608 | 1,018,608 | 1,018,608 |
| 17        | Bandung Kidul    | 699,384                    | 707,484   | 737,136   | 737,136   | 737,136   | 737,136   | 737,136   |
| 18        | Astanaanyar      | 816,504                    | 825,960   | 858,300   | 858,300   | 858,300   | 858,300   | 858,300   |
| 19        | Kiaracondong     | 1,565,520                  | 1,583,664 | 1,644,456 | 1,644,456 | 1,644,456 | 1,644,456 | 1,644,456 |
| 20        | Buahbatu         | 1,128,216                  | 1,141,296 | 1,186,224 | 1,186,224 | 1,186,224 | 1,186,224 | 1,186,224 |
| 21        | Mandalajati      | 754,188                    | 762,936   | 788,016   | 788,016   | 788,016   | 788,016   | 788,016   |
| 22        | Cibiru           | 854,292                    | 864,192   | 882,924   | 882,924   | 882,924   | 882,924   | 882,924   |
| 23        | Bojongloa Kidul  | 1,016,232                  | 1,028,016 | 1,072,380 | 1,072,380 | 1,072,380 | 1,072,380 | 1,072,380 |
| 24        | Cibeunying Kaler | 841,332                    | 851,088   | 885,192   | 885,192   | 885,192   | 885,192   | 885,192   |
| 25        | Panyileukan      | 477,444                    | 482,976   | 493,536   | 493,536   | 493,536   | 493,536   | 493,536   |
| 26        | Antapani         | 883,296                    | 893,532   | 927,876   | 927,876   | 927,876   | 927,876   | 927,876   |
| 27        | Lengkong         | 844,452                    | 854,244   | 890,052   | 890,052   | 890,052   | 890,052   | 890,052   |
| 28        | Sukasari         | 971,652                    | 982,896   | 1,020,708 | 1,020,708 | 1,020,708 | 1,020,708 | 1,020,708 |
| 29        | Rancasari        | 912,168                    | 922,740   | 945,516   | 945,516   | 945,516   | 945,516   | 945,516   |
| 30        | Arcamanik        | 822,228                    | 831,756   | 854,520   | 854,520   | 854,520   | 854,520   | 854,520   |

## Meshing

To transform the GG-GF model with a dense Matérn covariance matrix to a GG-GMRF model with a sparse Matérn covariance matrix, the Linear Stochastic Partial Differential Equation (LSPDE) was solved by the Finite Element Method (FEM) based on triangulation of the spatial domain (Bandung city). We constructed the mesh using the prediction cells and a non-convex hull bounding them. We considered six different triangle meshes with six different edge lengths starting from 1 km up to 1.5 km, with a difference of 0.1 km. To avoid boundary effects the domain was extended using a lower triangle resolution for the outer area (Blangiardo and Camalety 2015). We selected a fixed edge length of 3 km for the outer area. Based on the DIC and WAIC criterion, the mesh with a 1.5 km edge length was found to be the optimal mesh.

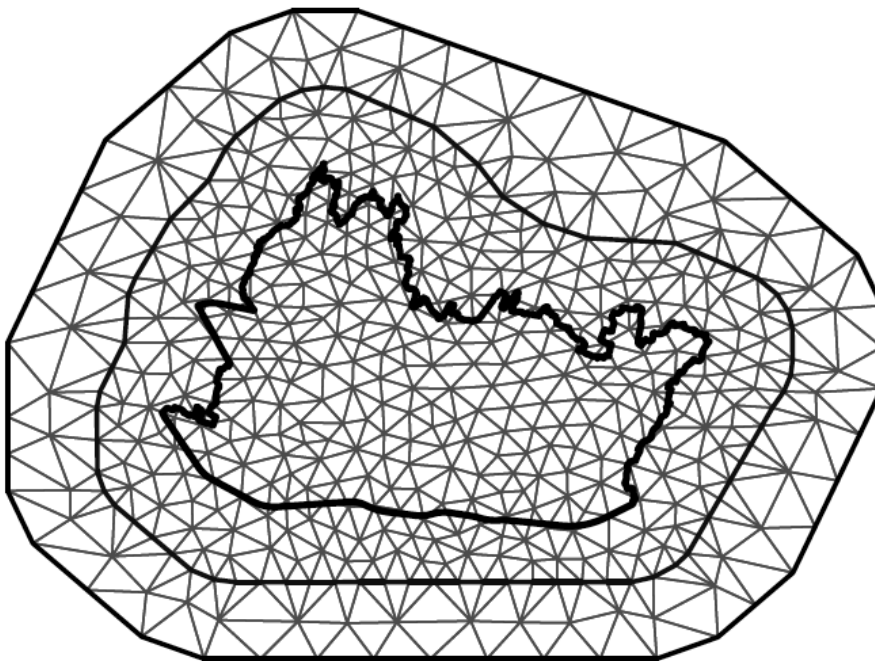

**Figure A.1** Triangle mesh of Bandung city (in km) with maximum edge 1.5 km and number of vertices  $L = 501$
